# Supplementary material for: Epidemiology and spatial distribution of bluetongue virus in Xinjiang, China
Source: PeerJ. 2019 Feb 22;7:e6514. doi: 10.7717/peerj.6514 (PMC6388665; doi:10.7717/peerj.6514)
Supplement: Supplemental Information 5 — Raw data. [file peerj-07-6514-s005.xlsx]

## Sheet: Sheet1
2012							2014-2015
Sampled region	cattle		goats and sheep				Prefectures	Cities（countries）	Number of samples	Number of positive samples	Positive rate%
	Number of samples	Positive rate%（%）	Number of samples	Number of positive samples	Positive rate%		Kumul Prefecture	Balikun County	115	5	4.35
Bayingolin Mongolian Autonomous Prefecture	0	0	120	4	3.33			Yiwu County	98	4	4.08
Hotan Prefecture	54	0	137	3	2.19			Hami City	156	8	5.13
Aksu Prefecture	144	0	218	2	0.92		Changji Hui Autonomous Prefecture	Qitai County	125	14	11.2
Habahe County	345	0	0	0	0			Jimsar County	133	8	6.02
Kashi Prefecture	68	0	273	6	2.2		Urumchi	Urumqi City	140	12	8.57
Changji Hui Autonomous Prefecture	48	0	200	2	1		Turpan Prefecture	Shanshan County	120	0	0
Ili Kazak Autonomous Prefecture	42	0	100	0	0			Turpan City	136	0	0
Hami City	0	0	393	2	0.51			Toksun County	122	0	0
In total	701	0	1441	19	1.32		Ili Kazakh Autonomous Prefecture	Yining County	132	7	5.3
							Bayingolin Mongol Autonomous Prefecture	Hejing County	137	21	15.33
								Heshuo County	215	19	8.84
								Yuli County	235	33	14.04
							Hotan Prefecture	Hetian City	127	11	8.66
							Kashgar Prefecture	Taxkorgan County	144	3	2.08
							In total		2135	145	6.79
